# Supplementary material for: Bio-Inspired Aquatic Propulsion Mechanism Using Viscoelastic Fin Containing Fiber Composite Shear Thickening Fluid
Source: MDPI journal article supplement (doi:10.3390/biomimetics8050405), 2023-09-01
Supplement: s1 [file s1]

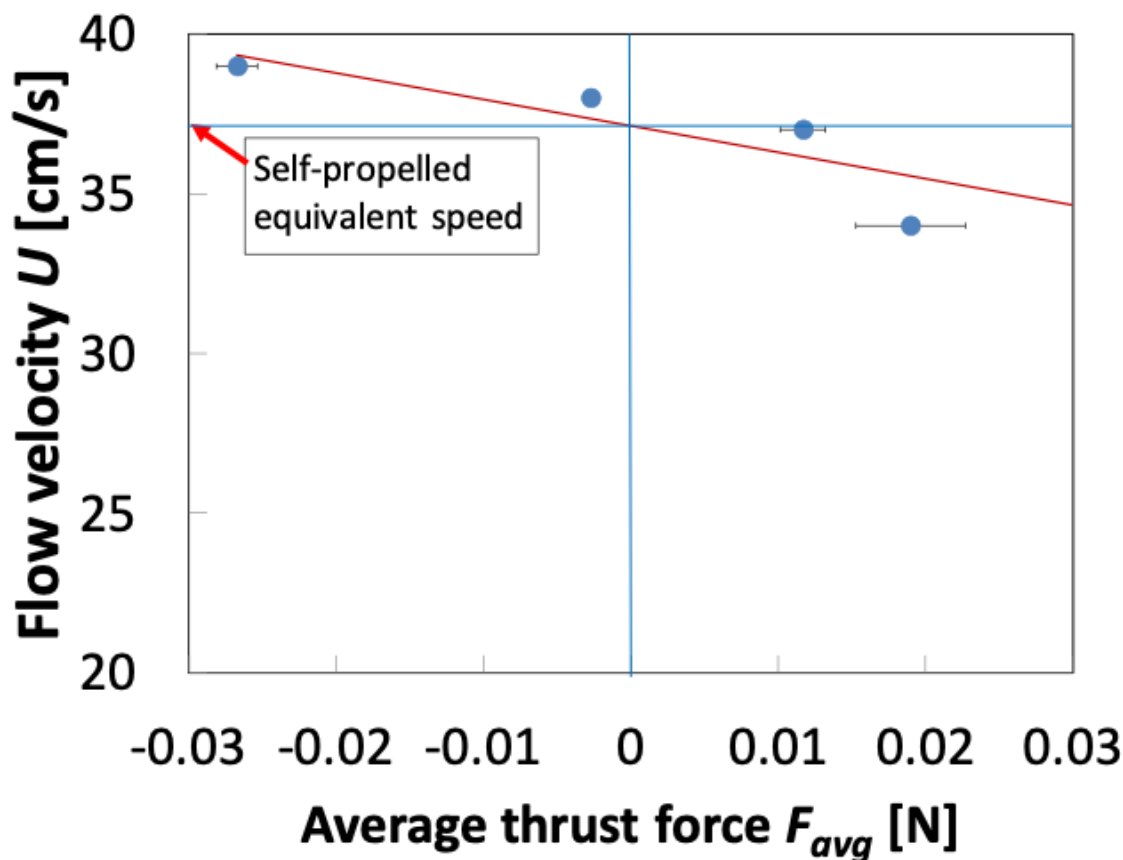

**Appendix B:** An example of the relationship between the flow velocity in uniform flow and the average propulsive force (as the method of determining the self-propelled equivalent speed) (oobleck + fibers (hard),  $T = 1.5$ s,  $\theta_{y-max} = 30^\circ$ ).
